# Supplementary material
Source: publisher figshare collection journal article supplement (https://frontiersin.figshare.com/ndownloader/files/12800102)
Supplement: Supplementary file [file 12800102]

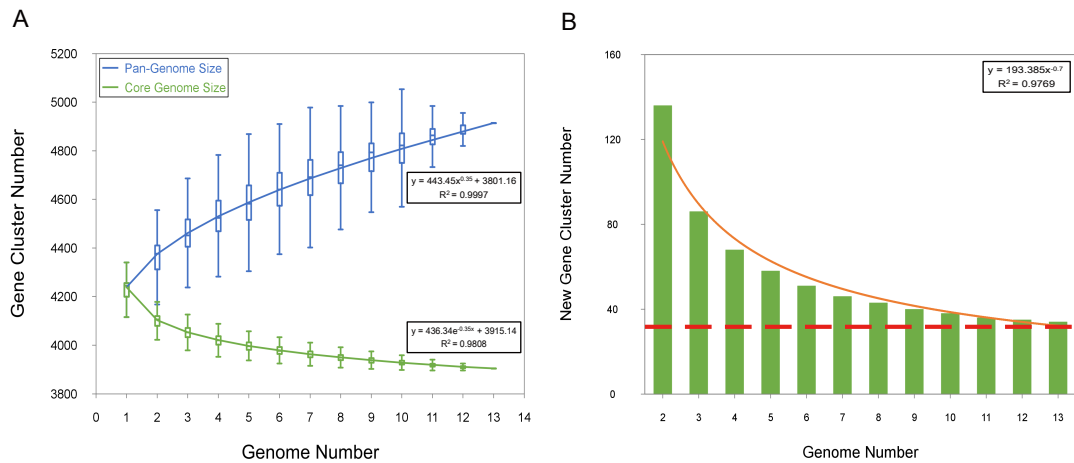

**Supplementary Figure S2.** The pan-genome of Mbo. (A) Gene accumulation curves of the pan-genome (blue) and the core-genome (green). The blue boxes denote the Mbo pan-genome size for each genomic comparison. The green boxes show the Mbo core genome size for each genomic comparison. The curve is the least squares fit of the power law for the average values. (B) Curve (red) showing the number of new genes against increase in the number of Mbo genomes.
